# Supplementary material
Source: Springer Nature journal article supplement (https://www.springermedizin.de/resource/supplementary/12998_2011_58_MOESM16_ESM.pdf/9680054)

# Relative Changes in EMG Activity

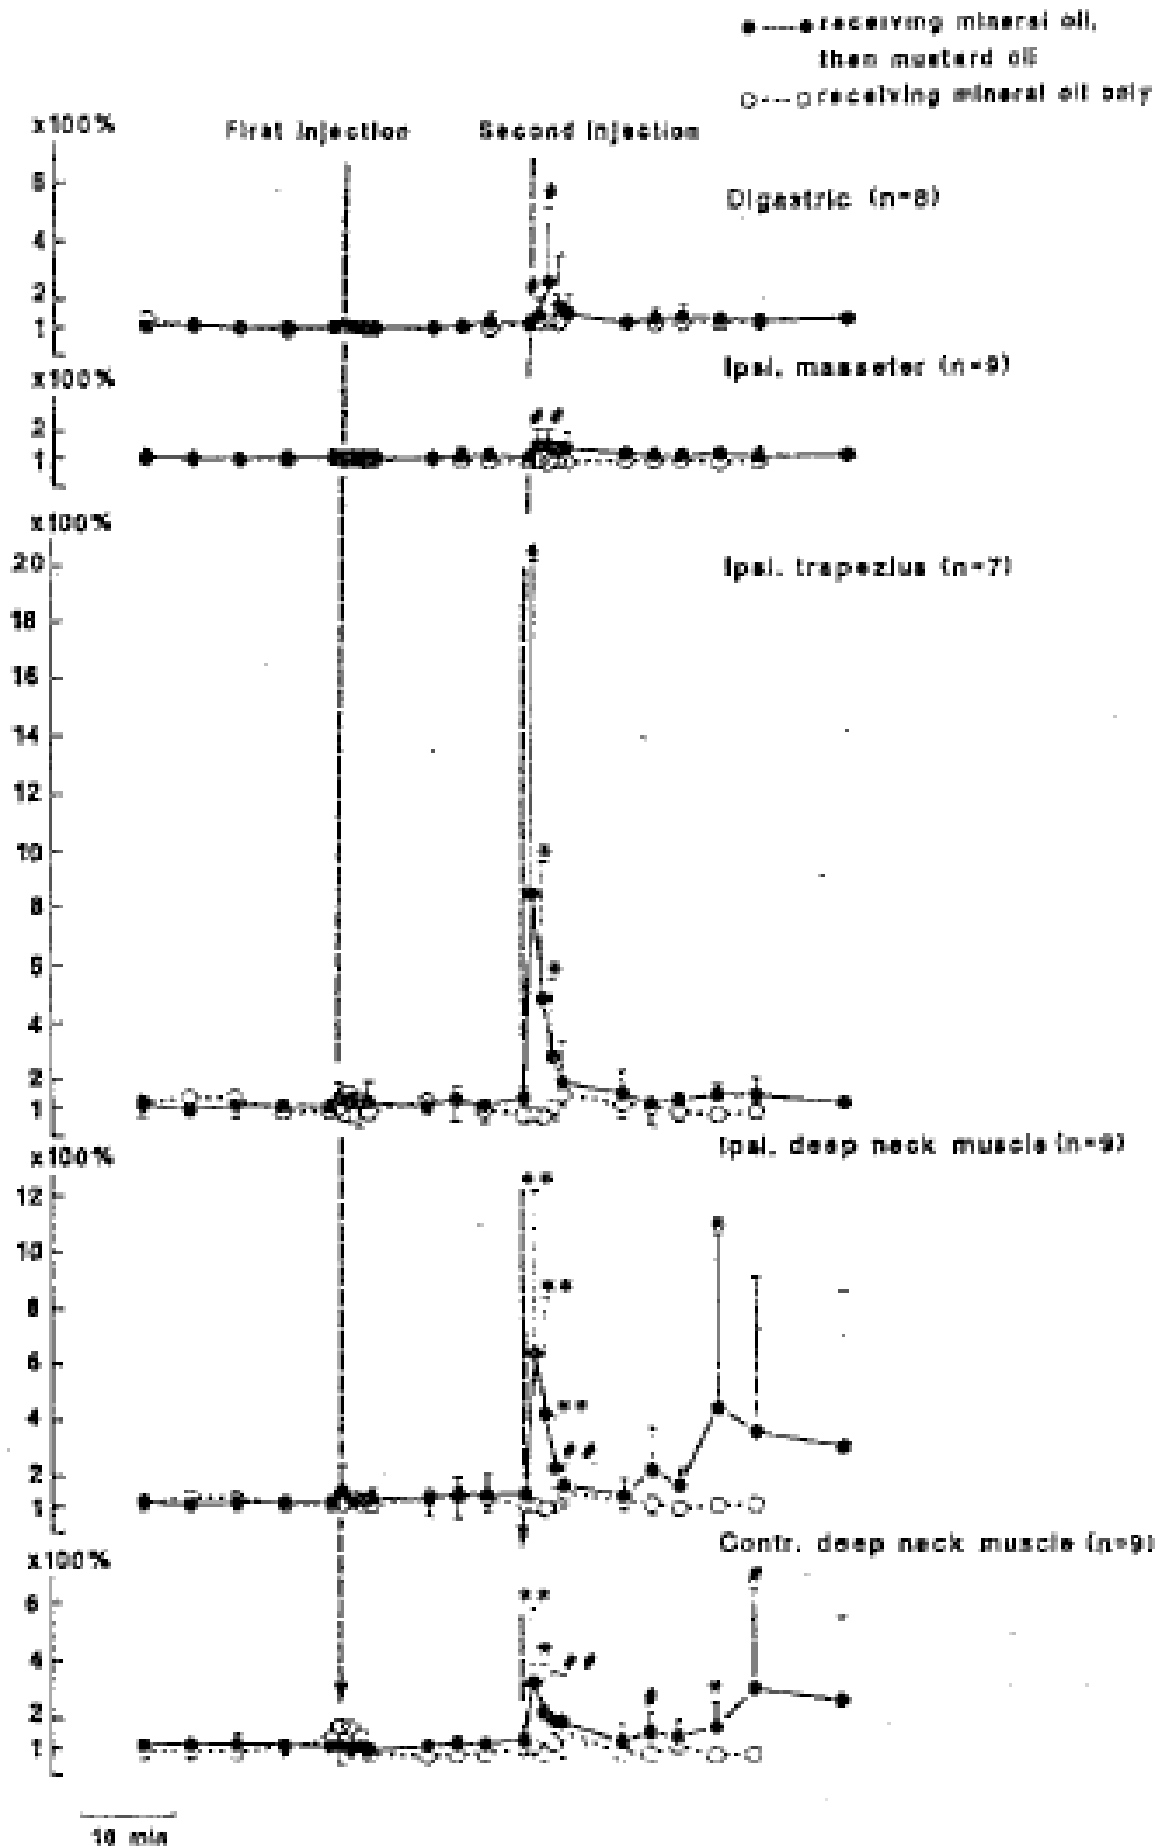

Supplement: MOESM16 [file 9680054]
